# Supplementary material for: An Integrative Multi-Network and Multi-Classifier Approach to Predict Genetic Interactions
Source: PubMed Central journal article supplement (PMC2936518; doi:10.1371/journal.pcbi.1000928), 2010-09-09
Supplement: pcbi.1000928.s001.pdf [file pcbi.1000928.s001.pdf]

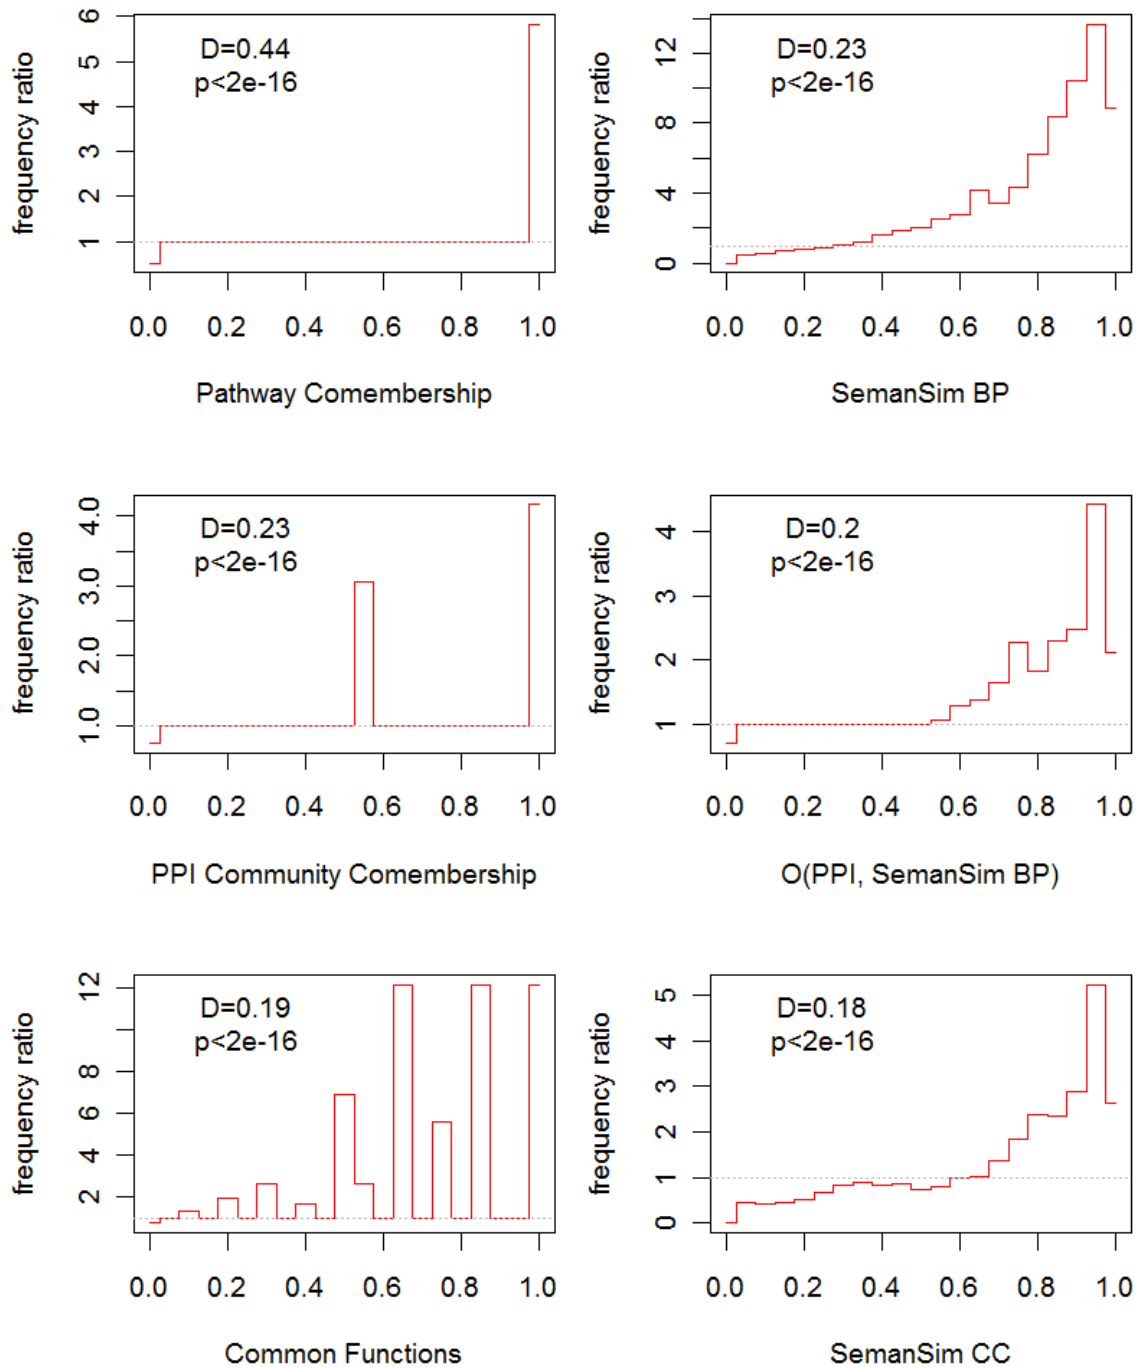

**Figure 1.** The top 8 most informative several SL-independent features used in our MNMC prediction approach. Different from Figure 2, here we show the ratio of the frequencies of each feature in the SL and non-SL sets. The Kolmogorov-Smirnov (KS) test to capture the difference of the distributions of a feature in the SL and non-SL classes. The D-statistics and p-values of the KS test are shown here.



**Table 1:** Description of 152 SL-independent and 15 SL-dependent features and their discriminative power (measured by KS test and pvalue) for separating the SL interactions from the non-SL ones

| Official Feature Name                       | Internal Feature Name         | Description                                                                                                                          | Nature of values | KS statistic | KS pvalue | Category                 |
|---------------------------------------------|-------------------------------|--------------------------------------------------------------------------------------------------------------------------------------|------------------|--------------|-----------|--------------------------|
| Bayesian Network                            | bayesian_network              | value 1 if there is a link in the Bayesian network (Zhu et al., Nature Genetics 2009), 0 otherwise                                   | binary           | 0.003773115  |           | 1 SL-independent feature |
| BN SemanSim                                 | bn_cocausality_semsim         | Semantic similarity between nodes in the Bayesian network using Lin's measure (Lin et al., ICML 1998)                                | real-valued      | 0.031544094  | 0.01101   | SL-independent feature   |
| BN Edge Betweenness                         | bn_edge_betweenness           | Betweenness of edge between two genes in the Bayesian network                                                                        | real-valued      | 0.013106287  | 0.76028   | SL-independent feature   |
| BN Edge Betweenness sqrooted                | bn_edge_betweenness_sqrooted  | Square root of betweenness of edges between two genes in Bayesian network (to avoid scale problems)                                  | real-valued      | 0.013106287  | 0.76028   | SL-independent feature   |
| BN Edge Degree                              | bn_edge_degree                | Degree of vertex corresponding to an edge in the Bayesian network in its edge graph version                                          | real-valued      | 0.003415334  |           | 1 SL-independent feature |
| BN (Undirected) Shortestpath                | bn_shortestpath_undirected    | Shortest path over Bayesian network treated as an undirected graph                                                                   | real-valued      | 0.023797362  | 0.10355   | SL-independent feature   |
| Causality Test Network                      | causality_test_network        | Value is 1 if there is an undirected link between nodes in causality test network (Schadt et al., Nature Genetics 2005), 0 otherwise | binary           | 0.005622043  |           | 1 SL-independent feature |
| Causality Network Shortestpath (undirected) | ctn_shortestpath_undirected   | Shortest path over undirected version of causality network                                                                           | real-valued      | 0.067413792  | 0.05534   | SL-independent feature   |
| Common QTL                                  | common_qtl                    | Value is 1 if the two genes have a common qtl (Zhu et al., Nature Genetics 2009), else zero.                                         | binary           | 3.77E-17     |           | 1 SL-independent feature |
| Common Functions                            | commonfunctions_shared        | Number of functions shared by two genes among 138 most populated GO BP terms recommended by Myers et al (2006)                       | real-valued      | 0.186161707  |           | 0 SL-independent feature |
| Common TF                                   | commonTF                      | Number of common transcription factors that two genes are regulated by                                                               | real-valued      | 0.045359829  | 0.12847   | SL-independent feature   |
| Complex Comembership                        | complex_comembership          | Number of complexes two proteins are co-members of                                                                                   | real-valued      | 0.115308739  | 0.42069   | SL-independent feature   |
| DNA Seq Blast alignmentlength               | dna_seq_blast_alignmentlength | Length of BLAST alignment over DNA sequences of two genes                                                                            | real-valued      | 0.009120049  | 0.42465   | SL-independent feature   |
| DNA Seq Blast bitscore                      | dna_seq_blast_bitscore        | Bit score of BLAST alignment over DNA sequences of two genes                                                                         | real-valued      | 0.009120049  | 0.42465   | SL-independent feature   |
| DNA Seq Simil                               | dna_seq_blast_evalue          | E-value of BLAST alignment over DNA sequences of two genes                                                                           | real-valued      | 0.009287368  | 0.40174   | SL-independent feature   |

|                               |                               |                                                                                                                                                                                  |             |             |          |                          |
|-------------------------------|-------------------------------|----------------------------------------------------------------------------------------------------------------------------------------------------------------------------------|-------------|-------------|----------|--------------------------|
| DNA Seq Blast numgaps         | dna_seq_blast_numgaps         | Number of gaps included in BLAST alignment over dna sequences of two genes                                                                                                       | real-valued | 0.00040028  |          | 1 SL-independent feature |
| DNA Seq Blast nummismatches   | dna_seq_blast_nummismatches   | Number of mismatches in BLAST alignment over DNA sequences of two genes                                                                                                          | real-valued | 0.008351062 | 0.53855  | SL-independent feature   |
| DNA Seq Blast percentidentity | dna_seq_blast_percentidentity | Percentage identity in BLAST alignment over DNA sequences of two genes                                                                                                           | real-valued | 0.009120049 | 0.42465  | SL-independent feature   |
| Module Comembership (MN Abs)  | mn_abs_module                 | Co-membership in co-expression modules (Zhang & Horvath, SAGMB 2005) derived from absolute value of correlations over Mnaimneh's expression data set (Mnaimneh et al. Cell 2004) | binary      | 0.001012591 |          | 1 SL-independent feature |
| MN Abs TOM                    | mn_abs_tom                    | Topological overlap (Zhang & Horvath, SAGMB 2005) measured over the absolute value of correlations over Mnaimneh's expression data set                                           | real-valued | 0.030461558 | 7.05E-08 | SL-independent feature   |
| MN Corrl                      | mn_corr                       | Pairwise correlations of genes over Mnaimneh's expression data set                                                                                                               | real-valued | 0.047197933 |          | 0 SL-independent feature |
| Module Comembership (MN Neg)  | mn_neg_module                 | Co-membership in co-expression modules derived only from negative correlations over Mnaimneh's expression data set                                                               | binary      | 0.00304585  |          | 1 SL-independent feature |
| MN Neg TOM                    | mn_neg_tom                    | Topological overlap over negative correlations over Mnaimneh's expression data set                                                                                               | real-valued | 0.044054877 | 5.55E-16 | SL-independent feature   |
| KO - Signature                | oneko_otheraffected           | Value is 1 if one gene being knocked out changes the expression of the other gene, 0 otherwise (Hughes et al. Cell 2000)                                                         | binary      | 0.013816833 | 0.80678  | SL-independent feature   |
| Phyloprofiles Misim           | phyloprofiles_misim           | Mutual information between the phylogenetic profiles of two proteins                                                                                                             | real-valued | 0.067342651 |          | 0 SL-independent feature |
| PPI Clique Comembership       | ppi_clique_comembership       | Number of cliques in the PPI network (Zhu et al., Nature Genetics 2009) two proteins are co-members of                                                                           | real-valued | 0.083961527 |          | 0 SL-independent feature |
| PPI Community Comembership    | ppi_community_comembership    | Number of communities derived from PPI network that two proteins are co-members of                                                                                               | real-valued | 0.225759947 |          | 0 SL-independent feature |
| PPI Edge Betweenness          | ppi_edge_betweenness          | Betweenness of the edge between two proteins in the PPI network                                                                                                                  | real-valued | 0.044418223 | 2.13E-14 | SL-independent feature   |
| PPI Edge Betweenness Sqrooted | ppi_edge_betweenness_sqrooted | Square root of betweenness of the edge between two proteins in PPI network (to avoid scale problems)                                                                             | real-valued | 0.044418223 | 2.13E-14 | SL-independent feature   |
| PPI Edge Degree               | ppi_edge_degree               | Degree of vertex corresponding to an edge in the PPI network in its edge graph version                                                                                           | real-valued | 0.04443815  | 2.08E-14 | SL-independent feature   |

|                                   |                                   |                                                                                                                                                                                 |             |             |          |                        |
|-----------------------------------|-----------------------------------|---------------------------------------------------------------------------------------------------------------------------------------------------------------------------------|-------------|-------------|----------|------------------------|
| PPI Module Comembership           | ppi_module_comembership           | Co-membership in module discovered from PPI network (Zhang & Horvath, SAGMB 2005)                                                                                               | binary      | 0.045673668 | 3.33E-15 | SL-independent feature |
| PPI                               | ppi_network                       | Value is 1 if there is an edge between two proteins in the PPI network, 0 otherwise                                                                                             | binary      | 0.044398296 | 2.20E-14 | SL-independent feature |
| PPI Shortest Path                 | ppi_shortestpath                  | Length of shortest path between two proteins in PPI network                                                                                                                     | real-valued | 0.1400902   | 0        | SL-independent feature |
| PPI TOM                           | ppi_tom                           | Value of topological overlap (Zhang & Horvath, SAGMB 2005) between two proteins computed from PPI network                                                                       | real-valued | 0.099168921 | 0        | SL-independent feature |
| Protein Seq Blast Alignmentlength | protein_seq_blast_alignmentlength | Length of BLAST alignment over amino acid sequences of two proteins                                                                                                             | real-valued | 0.027204966 | 2.25E-06 | SL-independent feature |
| Protein Seq Blast Bitscore        | protein_seq_blast_bitscore        | Bit score of BLAST alignment over amino acid sequences of two proteins                                                                                                          | real-valued | 0.027149193 | 2.38E-06 | SL-independent feature |
| Protein Seq Blast Simil           | protein_seq_blast_evaluation      | E-value of BLAST alignment over amino acid sequences of two proteins                                                                                                            | real-valued | 0.027181064 | 2.30E-06 | SL-independent feature |
| Protein Seq Blast Numgaps         | protein_seq_blast_numgaps         | Number of gaps included in BLAST alignment over amino acid sequences of two proteins                                                                                            | real-valued | 0.023544959 | 7.00E-05 | SL-independent feature |
| Protein Seq Blast Nummismatches   | protein_seq_blast_nummismatches   | Number of mismatches in BLAST alignment over amino acid sequences                                                                                                               | real-valued | 0.026848923 | 3.21E-06 | SL-independent feature |
| Protein Seq Blast Percentidentity | protein_seq_blast_percentidentity | Percentage identity in BLAST alignment over amino acid sequences                                                                                                                | real-valued | 0.027149193 | 2.38E-06 | SL-independent feature |
| Module Comembership (Brem Abs)    | brem_abs_module                   | Value is 1 if two genes are co-members of a co-expression module defined by absolute value of correlations over Brem's data set (Zhu et al., Nature Genetics 2009), 0 otherwise | binary      | 0.057280817 | 0        | SL-independent feature |
| Brem Abs TOM                      | brem_abs_tom                      | Topological overlap measured over the absolute value of correlations over Brem's expression data set                                                                            | real-valued | 0.049681888 | 0        | SL-independent feature |
| Brem Correl                       | brem_corr                         | Pairwise correlation of genes computed over Brem's gene expression data set                                                                                                     | real-valued | 0.090469465 | 0        | SL-independent feature |
| Brem Neg Module Commembership     | brem_neg_module                   | Co-membership in coexpression modules discovered using negative correlations from Brem's expression data set                                                                    | binary      | 0.078155158 | 0        | SL-independent feature |
| Brem Neg TOM                      | brem_neg_tom                      | Topological overlap over negative correlations computed from Brem's expression data set                                                                                         | real-valued | 0.090581254 | 0        | SL-independent feature |

|                                    |                       |                                                                                                                                                                                                     |             |             |          |                        |
|------------------------------------|-----------------------|-----------------------------------------------------------------------------------------------------------------------------------------------------------------------------------------------------|-------------|-------------|----------|------------------------|
| Module Comembership (Rosetta Abs)  | rosetta_abs_module    | Value is 1 if two genes are co-members of a co-expression module defined by absolute value of correlations over Hughes et al's Rosetta microarray compendium (Hughes et al. Cell 2000), 0 otherwise | binary      | 0.013910463 | 0.05673  | SL-independent feature |
| Rosetta Abs TOM                    | rosetta_abs_tom       | Topological overlap measured over the absolute value of correlations over Hughes et al's Rosetta microarray compendium                                                                              | real-valued | 0.006263813 | 0.86298  | SL-independent feature |
| Rosetta Corrl                      | rosetta_corr          | Pairwise correlation of genes computed over Hughes et al's Rosetta microarray compendium                                                                                                            | real-valued | 0.021969856 | 0.00028  | SL-independent feature |
| Module Comembership (Rosetta Neg)  | rosetta_neg_module    | Value is 1 if two genes are co-members of a co-expression module discovered using negative correlations computed from Hughes et al's Rosetta microarray compendium, 0 otherwise                     | binary      | 0.009819535 | 0.33725  | SL-independent feature |
| Rosetta Neg TOM                    | rosetta_neg_tom       | Topological overlap over negative correlations computed from Hughes et al (2000)'s Rosetta expression compendium                                                                                    | real-valued | 0.019434071 | 0.00191  | SL-independent feature |
| Same Mutant                        | same_mutant_phenotype | Number of mutant phenotypes shared by two genes                                                                                                                                                     | real-valued | 0.026814789 | 3.41E-06 | SL-independent feature |
| SemanSim BP                        | semsim_bp             | Similarity of two genes using their annotations to GO BP terms and semantic similarity between the terms (Tao et al. Bioinformatics 2007)                                                           | real-valued | 0.230677446 | 0        | SL-independent feature |
| SemanSim CC                        | semsim_cc             | Similarity of two genes using their annotations to GO CC terms and semantic similarity between the terms                                                                                            | real-valued | 0.182661826 | 0        | SL-independent feature |
| SemanSim MF                        | semsim_mf             | Similarity of two genes using their annotations to GO MF terms and semantic similarity between the terms                                                                                            | real-valued | 0.076373486 | 0        | SL-independent feature |
| Module Comembership (Spellman Abs) | spellman_abs_module   | Value is 1 if two genes are co-members of a module derived from absolute value of correlations computed from Spellman's expression data set (Spellman et al. Mol Biol Cell 2007)                    | binary      | 0.027265957 | 2.45E-06 | SL-independent feature |
| Spellman Abs TOM                   | spellman_abs_tom      | Topological overlap over absolute value of correlations from Spellman's expression data set                                                                                                         | real-valued | 0.064747704 | 0        | SL-independent feature |
| Spellman Corrl                     | spellman_corr         | Pairwise correlations of genes over Spellman's expression data set                                                                                                                                  | real-valued | 0.059435461 | 0        | SL-independent feature |

|                                    |                                                    |                                                                                                                                                                                         |             |             |          |                                |
|------------------------------------|----------------------------------------------------|-----------------------------------------------------------------------------------------------------------------------------------------------------------------------------------------|-------------|-------------|----------|--------------------------------|
| Module Comembership (Spellman Neg) | spellman_neg_module                                | Co-membership in modules derived from negative correlations from Spellman's data                                                                                                        | binary      | 0.030391715 | 9.05E-08 | SL-independent feature         |
| Spellman Neg TOM                   | spellman_neg_tom                                   | Topological overlap over negative correlations over Spellman's expression data set                                                                                                      | real-valued | 0.061712989 | 0        | SL-independent feature         |
| TF Activity                        | tfactivity                                         | 1 if one of the proteins is a transcription factor for the other, else 0 (Reference?)                                                                                                   | binary      | 0.066955929 | 0.27201  | SL-independent feature         |
| Pathway Comembership               | within_pathways                                    | Co-membership in the same KEGG pathway                                                                                                                                                  | binary      | 0.438803136 | 0        | SL-independent feature         |
| O(BN, DNA Seq Simil)               | bn_cocausality_semsim_dna_seq_blast_evaluation     | Overlay between semantic similarity between nodes in Bayesian network and E-value of BLAST alignment over DNA sequences of genes                                                        | real-valued | 0.033506277 | 2.82E-07 | SL-independent overlay feature |
| O(BN, MN Abs TOM)                  | bn_cocausality_semsim_mn_abs_tom                   | Overlay between semantic similarity between nodes in Bayesian network and topological overlap over absolute value of correlations computed from Mnaimneh's expression data set          | real-valued | 0.040759334 | 1.57E-05 | SL-independent overlay feature |
| BN_MN Corrl                        | bn_cocausality_semsim_mn_corr                      | Overlay between semantic similarity between nodes in Bayesian network and pairwise correlations computed from Mnaimneh's expression data set                                            | real-valued | 0.045082241 | 1.43E-09 | SL-independent overlay feature |
| O(BN, MN Neg TOM)                  | bn_cocausality_semsim_mn_neg_tom                   | Overlay between semantic similarity over nodes in Bayesian network and topological overlap over negative correlations computed from Mnaimneh's expression data set                      | real-valued | 0.071865925 | 2.92E-05 | SL-independent overlay feature |
| O(BN, PPI)                         | bn_cocausality_semsim_ppi_network                  | Overlay between semantic similarity over nodes in Bayesian network and PPI network                                                                                                      | real-valued | 0.083488599 | 0        | SL-independent overlay feature |
| O(BN, Protein Seq Simil)           | bn_cocausality_semsim_protein_seq_blast_evaluation | Overlay between semantic similarity between nodes in Bayesian network and E-value of BLAST alignment over amino acid sequences of proteins                                              | real-valued | 0.04139262  | 1.20E-10 | SL-independent overlay feature |
| O(BN, Brem Abs TOM)                | bn_cocausality_semsim_brem_abs_tom                 | Overlay between semantic similarity between nodes in Bayesian network and topological overlap measured over the absolute value of correlations computed from Brem's expression data set | real-valued | 0.072567791 | 0        | SL-independent overlay feature |
| O(BN, Brem Corrl)                  | bn_cocausality_semsim_brem_corr                    | Overlay between semantic similarity between nodes in Bayesian network and pairwise correlations between genes computed from Brem's expression data set                                  | real-valued | 0.046601724 | 2.05E-13 | SL-independent overlay feature |

|                                     |                                                       |                                                                                                                                                                                           |             |             |          |                                |
|-------------------------------------|-------------------------------------------------------|-------------------------------------------------------------------------------------------------------------------------------------------------------------------------------------------|-------------|-------------|----------|--------------------------------|
| O(BN, Brem Neg TOM)                 | bn_cocausality_semsim_brem_neg_tom                    | Overlay between semantic similarity between nodes in Bayesian network and topological overlap measured over negative correlations computed from Brem's expression data set                | real-valued | 0.084354265 | 0        | SL-independent overlay feature |
| O(BN, Same Mutant)                  | bn_cocausality_semsim_same_mutant_phenotype           | Overlay between semantic similarity between nodes in Bayesian network and number of mutant phenotypes shared by two genes                                                                 | real-valued | 0.038003287 | 4.92E-06 | SL-independent overlay feature |
| O(BN, SemanSim BP)                  | bn_cocausality_semsim_semsim_bp                       | Overlay between semantic similarity between nodes in Bayesian network and GO BP-based similarity network                                                                                  | real-valued | 0.027468419 | 4.03E-05 | SL-independent overlay feature |
| O(BN, SemanSim MF)                  | bn_cocausality_semsim_semsim_mf                       | Overlay between semantic similarity between nodes in Bayesian network and GO MF-based annotation similarities between genes                                                               | real-valued | 0.055350485 | 0        | SL-independent overlay feature |
| O(DNA Seq Simil, MN Abs TOM)        | dna_seq_blast_evaluation_mn_abs_tom                   | Overlay between E-value of BLAST alignment over DNA sequences of genes and topological overlap over absolute value of correlations computed from Mnaimneh's expression data set           | real-valued | 0.005748227 | 0.99068  | SL-independent overlay feature |
| O(DNA Seq Simil, MN Corrl)          | dna_seq_blast_evaluation_mn_corr                      | Overlay between E-value of BLAST alignment over DNA sequences of genes and pairwise correlations between genes computed from Mnaimneh's expression data set                               | real-valued | 0.015058817 | 0.05696  | SL-independent overlay feature |
| O(DNA Seq Simil, PPI)               | dna_seq_blast_evaluation_ppi_network                  | Overlay between E-value of BLAST alignment over DNA sequences of genes and PPI network                                                                                                    | real-valued | 0.023231347 | 0.0001   | SL-independent overlay feature |
| O(DNA Seq Simil, Protein Seq Simil) | dna_seq_blast_evaluation_protein_seq_blast_evaluation | Overlay between E-values of BLAST alignments over DNA sequences of genes and amino acid sequence of proteins                                                                              | real-valued | 0.029438767 | 2.79E-07 | SL-independent overlay feature |
| O(DNA Seq Simil, Brem Abs TOM)      | dna_seq_blast_evaluation_brem_abs_tom                 | Overlay between E-value of BLAST alignment over DNA sequences of genes and topological overlap over absolute value of correlations between genes computed from Brem's expression data set | real-valued | 0.042048381 | 3.27E-13 | SL-independent overlay feature |
| O(DNA Seq Simil, Brem Corrl)        | dna_seq_blast_evaluation_brem_corr                    | Overlay between E-value of BLAST alignment over DNA sequences of genes and correlations between genes computed from Brem's expression data                                                | real-valued | 0.01906552  | 0.00257  | SL-independent overlay feature |



|                                  |                                         |                                                                                                                                                                                                            |             |             |          |                                |
|----------------------------------|-----------------------------------------|------------------------------------------------------------------------------------------------------------------------------------------------------------------------------------------------------------|-------------|-------------|----------|--------------------------------|
| O(DNA Seq Simil, SemanSim BP)    | dna_seq_blast_evaluation_semsim_bp      | Overlay between E-value of BLAST alignment over DNA sequences of genes and GO BP-based annotation similarities between genes                                                                               | real-valued | 0.042519114 | 6.11E-15 | SL-independent overlay feature |
| O(DNA Seq Simil, SemanSim MF)    | dna_seq_blast_evaluation_semsim_mf      | Overlay between E-value of BLAST alignment over DNA sequences of genes and GO MF-based annotation similarities between genes                                                                               | real-valued | 0.020677145 | 0.00074  | SL-independent overlay feature |
| O(MN Abs TOM, MN Corrl)          | mn_abs_tom_mn_corr                      | Overlay between topological overlap over absolute value of correlations computed from Mnaimneh's expression data set and pairwise correlations between genes over Mnaimneh's expression data set           | real-valued | 0.031074038 | 0.00275  | SL-independent overlay feature |
| O(MN Abs TOM, Protein Seq Simil) | mn_abs_tom_protein_seq_blast_evaluation | Overlay between topological overlap measured over the absolute value of the correlations computed from Mnaimneh's expression data set and E-value of BLAST alignment over amino acid sequences of proteins | real-valued | 0.009833422 | 0.65455  | SL-independent overlay feature |
| O(MN Abs TOM, Brem Abs TOM)      | mn_abs_tom_brem_abs_tom                 | Overlay between topological overlap over absolute value of correlations computed from Mnaimneh's and Brem's expression data sets                                                                           | real-valued | 0.073671194 | 0        | SL-independent overlay feature |
| O(MN Abs TOM, Brem Corrl)        | mn_abs_tom_brem_corr                    | Overlay between topological overlap over absolute value of correlations computed from Mnaimneh's expression data set and pairwise correlations between genes computed from Brem's expression data set      | real-valued | 0.036933483 | 4.07E-07 | SL-independent overlay feature |
| O(MN Abs TOM, SemanSim BP)       | mn_abs_tom_semsim_bp                    | Overlay between topological overlap measured over the absolute value of the correlations computed from Mnaimneh's expression data set and GO BP-based annotation similarities between genes                | real-valued | 0.017973033 | 0.04317  | SL-independent overlay feature |
| O(MN Abs TOM, SemanSim MF)       | mn_abs_tom_semsim_mf                    | Overlay between topological overlap measured over the absolute value of correlations over Mnaimneh's expression data set and GO MF-based similarity network                                                | real-valued | 0.026803814 | 0.00039  | SL-independent overlay feature |
| O(MN Corrl, Protein Seq Simil)   | mn_corr_protein_seq_blast_evaluation    | Overlay between correlations between genes computed from Mnaimneh's expression data set and E-value of BLAST alignment over amino acid sequences of proteins                                               | real-valued | 0.027525876 | 2.12E-05 | SL-independent overlay feature |

|                                    |                                       |                                                                                                                                                                                                                                                |             |             |          |                                |
|------------------------------------|---------------------------------------|------------------------------------------------------------------------------------------------------------------------------------------------------------------------------------------------------------------------------------------------|-------------|-------------|----------|--------------------------------|
| O(Brem Abs TOM, MN Corrl)          | brem_abs_tom_mn_corr                  | Overlay between topological overlap measured over the absolute value of correlations computed from Brem's gene expression data set and pairwise correlations between genes computed from Mnaimneh's expression data set                        | real-valued | 0.070735606 | 0        | SL-independent overlay feature |
| O(Brem Abs TOM, Protein Seq Simil) | brem_abs_tom_protein_seq_blast_evalue | Overlay between topological overlap over absolute value of correlation computed from Brem's expression data set and E-value of BLAST alignment over amino acid sequences of proteins                                                           | real-valued | 0.049884225 | 0        | SL-independent overlay feature |
| O(Brem Abs TOM, Brem Corrl)        | brem_abs_tom_brem_corr                | Overlay between topological overlap measured over the negative correlations computed from Brem's expression data set and pairwise correlations computed from Brem's expression data set                                                        | real-valued | 0.048180526 | 2.22E-16 | SL-independent overlay feature |
| O(Brem Corrl, MN Corrl)            | brem_corr_mn_corr                     | Overlay between pairwise correlations between genes computed from Brem's and Mnaimneh's expression data sets                                                                                                                                   | real-valued | 0.056061276 | 0        | SL-independent overlay feature |
| O(Brem Corrl, Protein Seq Simil)   | brem_corr_protein_seq_blast_evalue    | Overlay between pairwise correlations between genes computed from Brem's expression data set and E-value of BLAST alignment over amino acid sequences of proteins                                                                              | real-valued | 0.053322909 | 0        | SL-independent overlay feature |
| O(Brem Neg TOM, DNA Seq Simil)     | brem_neg_tom_dna_seq_blast_evalue     | Overlay between topological overlap over negative correlations computed from Brem's expression data set and E-value of BLAST alignment over DNA sequences of genes                                                                             | real-valued | 0.039811385 | 2.41E-10 | SL-independent overlay feature |
| O(Brem Neg TOM, MN Abs TOM)        | brem_neg_tom_mn_abs_tom               | Overlay between topological overlap measured over the negative correlations computed from Brem's expression data set and topological overlap measured over the absolute value of the correlations computed from Mnaimneh's expression data set | real-valued | 0.099627888 | 0        | SL-independent overlay feature |
| O(Brem Neg TOM, MN Corrl)          | brem_neg_tom_mn_corr                  | Overlay between topological overlap over negative correlations computed from Brem's expression data set and correlations between genes computed from Mnaimneh's expression data set                                                            | real-valued | 0.077880457 | 0        | SL-independent overlay feature |

|                                    |                                            |                                                                                                                                                                                                                             |             |             |          |                                |
|------------------------------------|--------------------------------------------|-----------------------------------------------------------------------------------------------------------------------------------------------------------------------------------------------------------------------------|-------------|-------------|----------|--------------------------------|
| O(Brem Neg TOM, MN Neg TOM)        | brem_neg_tom_mn_neg_tom                    | Overlay between topological overlap measured over the negative of correlations over brem's expression data set and topological overlap measured over the negative correlations computed from Mnaimneh's expression data set | real-valued | 0.146256768 | 0        | SL-independent overlay feature |
| O(Brem Neg TOM, PPI)               | brem_neg_tom_ppi_network                   | Overlay between topological overlap over negative correlations computed from Brem's expression data set and PPI network                                                                                                     | real-valued | 0.06636798  | 0        | SL-independent overlay feature |
| O(Brem Neg TOM, Protein Seq Simil) | brem_neg_tom_protein_seq_blast_evalue      | Overlay between topological overlap over negative correlations computed from Brem's expression data and E-value of BLAST alignment over amino acid sequences of proteins                                                    | real-valued | 0.06177282  | 0        | SL-independent overlay feature |
| O(Brem Neg TOM, Brem Abs TOM)      | brem_neg_tom_brem_abs_tom                  | Overlay between topological overlap measured over negative correlations and absolute value of all correlations computed from Brem's gene expression data set                                                                | real-valued | 0.092052147 | 0        | SL-independent overlay feature |
| O(Brem Neg TOM, Brem Corrl)        | brem_neg_tom_brem_corr                     | Overlay between topological overlap over negative correlations computed from Brem's expression data set and correlations between genes computed from Brem's expression data set                                             | real-valued | 0.067768057 | 0        | SL-independent overlay feature |
| O(Brem Neg TOM, Same Mutant)       | brem_neg_tom_same_mutant_phenotype         | Overlay between topological overlap over negative correlations computed from Brem's expression data set and number of common mutant phenotypes of genes                                                                     | real-valued | 0.049584765 | 2.59E-10 | SL-independent overlay feature |
| O(Brem Neg TOM, SemanSim BP)       | brem_neg_tom_seman_sim_bp                  | Overlay between topological overlap measured over the negative correlations computed from Brem's expression data set and GO BP-based annotation similarities between genes                                                  | real-valued | 0.051382212 | 0        | SL-independent overlay feature |
| O(Brem Neg TOM, SemanSim MF)       | brem_neg_tom_seman_sim_mf                  | Overlay between topological overlap measured over the negative correlations computed from Brem's gene expression data set and GO MF-based annotation similarities between genes                                             | real-valued | 0.055210647 | 0        | SL-independent overlay feature |
| O(Same Mutant, DNA Seq Simil)      | same_mutant_phenotype_dna_seq_blast_evalue | Overlay between number of common mutant phenotypes of genes and E-value of BLAST alignment over DNA sequences of genes                                                                                                      | real-valued | 0.019848173 | 0.00835  | SL-independent overlay feature |

|                                   |                                               |                                                                                                                                                                      |             |             |          |                                |
|-----------------------------------|-----------------------------------------------|----------------------------------------------------------------------------------------------------------------------------------------------------------------------|-------------|-------------|----------|--------------------------------|
| O(Same Mutant, MN Abs TOM)        | same_mutant_phenotype_mn_abs_tom              | Overlay between number of common mutant phenotypes of genes and topological overlap over absolute value of correlations computed from Mnaimneh's expression data set | real-valued | 0.038054823 | 7.90E-05 | SL-independent overlay feature |
| O(Same Mutant, MN Corrl)          | same_mutant_phenotype_mn_corr                 | Overlay between number of common mutant phenotypes of genes and pairwise correlations between genes computed from Mnaimneh's expression data set                     | real-valued | 0.061030243 | 0        | SL-independent overlay feature |
| O(PPI, Same Mutant Phenotype)     | same_mutant_phenotype_ppi_network             | Overlay between number of common mutant phenotypes of genes and PPI network                                                                                          | real-valued | 0.098738496 | 0        | SL-independent overlay feature |
| O(Same Mutant, Protein Seq Simil) | same_mutant_phenotype_protein_seq_blast_value | Overlay between number of common mutant phenotypes of genes and E-value of BLAST alignment over amino acid sequences of proteins                                     | real-valued | 0.058405267 | 0        | SL-independent overlay feature |
| O(Same Mutant, Brem Abs TOM)      | same_mutant_phenotype_brem_abs_tom            | Overlay between number of common mutant phenotypes of genes and topological overlap over absolute values of correlations computed from Brem's expression data set    | real-valued | 0.02904602  | 0.00013  | SL-independent overlay feature |
| O(Same Mutant, Brem Corrl)        | same_mutant_phenotype_brem_corr               | Overlay between number of common mutant phenotypes of genes and pairwise correlations between genes computed from Brem's expression data set                         | real-valued | 0.018140671 | 0.0228   | SL-independent overlay feature |
| O(Same Mutant, SemanSim BP)       | same_mutant_phenotype_semsim_bp               | Overlay between number of common mutant phenotypes of genes and GO BP-based annotation similarities between genes                                                    | real-valued | 0.038263379 | 2.10E-09 | SL-independent overlay feature |
| O(Same Mutant, SemanSim MF)       | same_mutant_phenotype_semsim_mf               | Overlay between number of common mutant phenotypes of genes and GO MF-based annotation similarities between genes                                                    | real-valued | 0.024476516 | 0.00042  | SL-independent overlay feature |
| O(MN Neg TOM, DNA Seq Simil)      | mn_neg_tom_dna_seq_blast_value                | Overlay between topological overlap over negative correlations computed from Mnaimneh's expression data and E-value of BLAST alignment over DNA sequences of genes   | real-valued | 0.002104359 | 1        | SL-independent overlay feature |
| O(MN Neg TOM, MN Abs TOM)         | mn_neg_tom_mn_abs_tom                         | Overlay between topological overlap measured over the negative correlations and the absolute value of correlations computed from Mnaimneh's gene expression data set | real-valued | 0.070476064 | 0.00153  | SL-independent overlay feature |

|                                  |                                     |                                                                                                                                                                                                      |             |             |          |                                |
|----------------------------------|-------------------------------------|------------------------------------------------------------------------------------------------------------------------------------------------------------------------------------------------------|-------------|-------------|----------|--------------------------------|
| O(MN Neg TOM, MN Corrl)          | mn_neg_tom_mn_corr                  | Overlay between topological overlap measured over the negative correlations computed from Mnaimneh's expression data set and pairwise correlations computed from Mnaimneh's gene expression data set | real-valued | 0.041075282 | 0.03905  | SL-independent overlay feature |
| O(MN Neg TOM, PPI)               | mn_neg_tom_ppi_network              | Overlay between topological overlap over negative correlations computed from Mnaimneh's expression data set and PPI network                                                                          | real-valued | 0.005657273 | 1        | SL-independent overlay feature |
| O(MN Neg TOM, Protein Seq Simil) | mn_neg_tom_protein_seq_blast_evalue | Overlay between topological overlap over negative correlations computed from Mnaimneh's expression data set and E-value of BLAST alignment over amino acid sequences of proteins                     | real-valued | 0.005396102 | 1        | SL-independent overlay feature |
| O(Brem Abs TOM, MN Neg TOM)      | mn_neg_tom_brem_abs_tom             | Overlay between topological overlap over negative correlations computed from Mnaimneh's expression data set and pairwise correlations computed from Brem's expression data set                       | real-valued | 0.116181926 | 2.22E-16 | SL-independent overlay feature |
| O(MN Neg TOM, Brem Corrl)        | mn_neg_tom_brem_corr                | Overlay between topological overlap over negative correlations computed from Mnaimneh's expression data set and pairwise correlations computed from Brem's expression data set                       | real-valued | 0.042318609 | 0.00316  | SL-independent overlay feature |
| O(MN Neg TOM< Same Mutant)       | mn_neg_tom_same_mutant_phenotype    | Overlay between topological overlap over negative correlations computed from Mnaimneh's expression data set and number of mutant phenotypes shared by genes                                          | real-valued | 0.040529238 | 0.0725   | SL-independent overlay feature |
| O(MN Neg TOM, SemanSim BP)       | mn_neg_tom_semsim_bp                | Overlay between topological overlap over negative correlations computed from Mnaimneh's expression data set and GO BP-based annotation similarities between genes                                    | real-valued | 0.012472343 | 0.92697  | SL-independent overlay feature |
| O(MN Neg TOM, SemanSim MF)       | mn_neg_tom_semsim_mf                | Overlay between topological overlap measured over the negative correlations computed from Mnaimneh's expression data set and GO MF-based annotation similarities between genes                       | real-valued | 0.043351885 | 0.0015   | SL-independent overlay feature |
| O(SemanSim BP, MN Corrl)         | semsim_bp_mn_corr                   | Overlay between GO BP-based annotation similarities between genes and pairwise correlations computed from Mnaimneh's expression data set                                                             | real-valued | 0.052965552 | 0        | SL-independent overlay feature |

|                                   |                                    |                                                                                                                                                                                          |             |             |          |                                |
|-----------------------------------|------------------------------------|------------------------------------------------------------------------------------------------------------------------------------------------------------------------------------------|-------------|-------------|----------|--------------------------------|
| O(SemanSim BP, Protein Seq Simil) | semsim_bp_protein_seq_blast_evalue | Overlay between GO BP-based annotation similarities between genes and E-value of BLAST alignment over amino acid sequences of proteins                                                   | real-valued | 0.13479471  | 0        | SL-independent overlay feature |
| O(SemanSim BP, Brem Abs TOM)      | semsim_bp_brem_abs_tom             | Overlay between GO BP-based annotation similarities between genes and topological overlap measured over the absolute value of correlations computed from Brem's gene expression data set | real-valued | 0.027322915 | 6.07E-06 | SL-independent overlay feature |
| O(SemanSim BP, Brem Corrl)        | semsim_bp_brem_corr                | Overlay between GO BP-based annotation similarities between genes and pairwise correlations computed from Brem's expression data set                                                     | real-valued | 0.032669623 | 5.51E-09 | SL-independent overlay feature |
| O(SemanSim CC, BN)                | semsim_cc_bn_cocausality_semsim    | Overlay between GO CC-based annotation similarities between genes and semantic similarity between nodes in Bayesian network                                                              | real-valued | 0.028285293 | 2.10E-05 | SL-independent overlay feature |
| O(SemanSim CC, DNA Seq Simil)     | semsim_cc_dna_seq_blast_evalue     | Overlay between GO CC-based annotation similarities between genes and E-value of BLAST alignment over DNA sequences of genes                                                             | real-valued | 0.03235424  | 7.88E-09 | SL-independent overlay feature |
| O(SemanSim CC, MN Abs TOM)        | semsim_cc_mn_abs_tom               | Overlay between GO CC-based annotation similarities between genes and topological overlap over absolute value of correlations computed from Mnaimneh's expression data                   | real-valued | 0.028348524 | 0.00014  | SL-independent overlay feature |
| O(SemanSim CC, MN Corrl)          | semsim_cc_mn_corr                  | Overlay between GO CC-based annotation similarities between genes and pairwise correlations between Mnaimneh's expression data set                                                       | real-valued | 0.043933768 | 9.06E-14 | SL-independent overlay feature |
| O(SemanSim CC, MN Neg TOM)        | semsim_cc_mn_neg_tom               | Overlay between GO CC-based annotation similarities between genes and topological overlap measured over the negative correlations computed from Mnaimneh's expression data set           | real-valued | 0.043727296 | 0.00132  | SL-independent overlay feature |
| O(PPI, SemanSim CC)               | semsim_cc_ppi_network              | Overlay between GO CC-based annotation similarities between genes and PPI network                                                                                                        | real-valued | 0.176806131 | 0        | SL-independent overlay feature |
| O(SemanSim CC, Protein Seq Simil) | semsim_cc_protein_seq_blast_evalue | Overlay between GO CC-based annotation similarities between genes and E-value of BLAST alignment over amino acid sequences of proteins                                                   | real-valued | 0.127923716 | 0        | SL-independent overlay feature |

|                                   |                                    |                                                                                                                                                                        |             |             |          |                                |
|-----------------------------------|------------------------------------|------------------------------------------------------------------------------------------------------------------------------------------------------------------------|-------------|-------------|----------|--------------------------------|
| O(SemanSim CC, Brem Abs TOM)      | semsim_cc_brem_abs_tom             | Overlay between GO CC-based annotation similarities between genes and topological overlap over absolute value of correlations computed from Brem's expression data set | real-valued | 0.028920246 | 1.32E-06 | SL-independent overlay feature |
| O(SemanSim CC, Brem Corrl)        | semsim_cc_brem_corr                | Overlay between GO CC-based annotation similarities between genes and pairwise correlations computed from brem's expression data set                                   | real-valued | 0.028709683 | 4.90E-07 | SL-independent overlay feature |
| O(SemanSim CC, Brem Neg TOM)      | semsim_cc_brem_neg_tom             | Overlay between GO CC-based annotation similarities between genes and topological overlap over negative correlations computed from Brem's expression data set          | real-valued | 0.072506963 | 0        | SL-independent overlay feature |
| O(SemanSim CC, Same Mutant)       | semsim_cc_same_mutant_phenotype    | Overlay between GO CC-based similarity network and number of same mutant phenotypes                                                                                    | real-valued | 0.025819366 | 0.00016  | SL-independent overlay feature |
| O(SemanSim CC, SemanSim BP)       | semsim_cc_semsim_bp                | Overlay between GO CC-based GO BP-based annotation similarities between genes                                                                                          | real-valued | 0.091608888 | 0        | SL-independent overlay feature |
| O(SemanSim MF, MN Corrl)          | semsim_mf_mn_corr                  | Overlay between GO MF-based annotation similarities between genes and correlations computed from Mnaimneh's expression data set                                        | real-valued | 0.022137984 | 0.00082  | SL-independent overlay feature |
| O(SemanSim MF, Protein Seq Simil) | semsim_mf_protein_seq_blast_evalue | Overlay between GO MF-based annotation similarities between genes and E-value of BLAST alignment over amino acid sequences of proteins                                 | real-valued | 0.071513298 | 0        | SL-independent overlay feature |
| O(SemanSim MF, Brem Abs TOM)      | semsim_mf_brem_abs_tom             | Overlay between GO MF-based annotation similarities between genes and correlations computed from Brem's expression data set                                            | real-valued | 0.024805619 | 5.67E-05 | SL-independent overlay feature |
| O(SemanSim MF, Brem Corrl)        | semsim_mf_brem_corr                | Overlay between GO MF-based annotation similarities between genes and correlation computed from Brem's expression data set                                             | real-valued | 0.023577441 | 6.96E-05 | SL-independent overlay feature |
| O(SemanSim MF, SemanSim BP)       | semsim_mf_semsim_bp                | Overlay between GO MF-based and GO BP-based annotation similarities between genes                                                                                      | real-valued | 0.072151332 | 0        | SL-independent overlay feature |
| O(PPI, MN Abs TOM)                | ppi_network_mn_abs_tom             | Overlay between PPI network and topological overlap over absolute value of correlations computed from Mnaimneh's expression data set                                   | real-valued | 0.030784057 | 4.59E-05 | SL-independent overlay feature |
| O(PPI, MN Corrl)                  | ppi_network_mn_corr                | Overlay between PPI network and pairwise correlations computed from Mnaimneh's expression data set                                                                     | real-valued | 0.041908933 | 3.56E-12 | SL-independent overlay feature |

|                           |                                      |                                                                                                                                                        |             |             |         |                                |
|---------------------------|--------------------------------------|--------------------------------------------------------------------------------------------------------------------------------------------------------|-------------|-------------|---------|--------------------------------|
| O(PPI, Proetin Seq Simil) | ppi_network_protein_seq_blast_evalue | Overlay between PPI network and E-value of BLAST alignment over amino acid sequences of proteins                                                       | real-valued | 0.075858782 | 0       | SL-independent overlay feature |
| O(PPI, Brem Abs TOM)      | ppi_network_brem_abs_tom             | Overlay between PPI network and topological overlap over absolute value of correlations computed from Brem's expression data set                       | real-valued | 0.062003938 | 0       | SL-independent overlay feature |
| O(PPI, Brem Corrl)        | ppi_network_brem_corr                | Overlay between PPI network and pairwise correlations over Brem's expression data set                                                                  | real-valued | 0.076577158 | 0       | SL-independent overlay feature |
| O(PPI, SemanSim BP)       | ppi_network_semsim_bp                | Overlay between PPI network and GO BP-based annotation similarities between genes                                                                      | real-valued | 0.197405365 | 0       | SL-independent overlay feature |
| O(PPI, SemanSim MF)       | ppi_network_semsim_mf                | Overlay between PPI network and GO MF-based annotation similarities between genes                                                                      | real-valued | 0.132627006 | 0       | SL-independent overlay feature |
| O(SL, BN)                 | SL_bn_cocausality_semsim             | Overlay between known SL network and semantic similarity between nodes in Bayesian network                                                             | real-valued | 0.096364627 | 0       | SL-dependent feature           |
| O(SL, DNA Seq Simil)      | SL_dna_seq_blast_evalue              | Overlay between known SL network and E-value of BLAST alignment over DNA sequences of genes                                                            | real-valued | 0.063439462 | 0       | SL-dependent feature           |
| O(SL, MN Abs TOM)         | SL_mn_abs_tom                        | Overlay between known SL network and topological overlap measured over the absolute value of correlations computed from Mnaimneh's expression data set | real-valued | 0.065410629 | 0       | SL-dependent feature           |
| O(SL, MN Correl)          | SL_mn_corr                           | Overlay between known SL network and pairwise correlations computed from Mnaimneh's expression data set                                                | real-valued | 0.083837139 | 0       | SL-dependent feature           |
| O(SL, MN Neg TOM)         | SL_mn_neg_tom                        | Overlay between known SL network and topological overlap measured over the negative correlations computed from Mnaimneh's expression data set          | real-valued | 0.042078079 | 0.01182 | SL-dependent feature           |
| O(SL, PPI)                | SL_ppi_network                       | Overlay between known SL network and PPI network                                                                                                       | binary      | 0.323399162 | 0       | SL-dependent feature           |
| O(SL, Protein Seq Simil)  | SL_protein_seq_blast_evalue          | Overlay between known SL network and E-value of BLAST alignment over amino acid sequences of proteins                                                  | real-valued | 0.17259688  | 0       | SL-dependent feature           |
| O(SL, Brem Abs TOM)       | SL_brem_abs_tom                      | Overlay between known SL network and topological overlap measured over the absolute value of correlations computed from Brem's expression data set     | real-valued | 0.101502743 | 0       | SL-dependent feature           |
| O(SL, Brem Correl)        | SL_brem_corr                         | Overlay between known SL network and pairwise correlations computed from Brem's expression data set                                                    | real-valued | 0.135605468 | 0       | SL-dependent feature           |



|                              |                          |                                                                                                                                           |             |             |                        |
|------------------------------|--------------------------|-------------------------------------------------------------------------------------------------------------------------------------------|-------------|-------------|------------------------|
| O(SL, Brem Neg TOM)          | SL_brem_neg_tom          | Overlay between known SL network and topological overlap measured over the negative correlations computed from Brem's expression data set | real-valued | 0.093487927 | 0 SL-dependent feature |
| O(SL, Same Mutant Phenotype) | SL_same_mutant_phenotype | Overlay between known SL network and number of shared mutant phenotypes of two genes                                                      | real-valued | 0.197997551 | 0 SL-dependent feature |
| O(SL, SemanSim BP)           | SL_semsim_bp             | Overlay between known SL network and GO BP-based annotation similarities between genes                                                    | real-valued | 0.386388856 | 0 SL-dependent feature |
| O(SL, SemanSim CC)           | SL_semsim_cc             | Overlay between known SL network and GO CC-based annotation similarities between genes                                                    | real-valued | 0.33896039  | 0 SL-dependent feature |
| O(SL, SemanSim MF)           | SL_semsim_mf             | Overlay between known SL network and GO MF-based annotation similarities between genes                                                    | real-valued | 0.247916137 | 0 SL-dependent feature |
| O(SL, SL)                    | SL_SL                    | Overlay between known SL network and itself                                                                                               | binary      | 0.310965687 | 0 SL-dependent feature |

**Table 2** - Thresholds for sparsifying networks

| <b>Network</b>           | <b>Threshold</b> |
|--------------------------|------------------|
| bn_cocausality_semsim    | 0                |
| dna_seq_blast_evalue     | 0                |
| mn_abs_tom               | 0.1              |
| mn_corr                  | $\pm 0.5$        |
| mn_neg_tom               | 0.1              |
| ppi_network              | 0                |
| protein_seq_blast_evalue | 0                |
| brem_abs_tom             | 0.1              |
| brem_corr                | $\pm 0.5$        |
| brem_neg_tom             | 0.1              |
| same_mutant_phenotype    | 1                |
| semsim_bp                | 0.5              |
| semsim_cc                | 0.7              |
| semsim_mf                | 0.5              |

**Table 3** - 8 known (highlighted rows) and 467 predicted TF SL interactions

| ORF.x   | GeneSymbol.x | ORF.y   | GeneSymbol.y | Classification Score |
|---------|--------------|---------|--------------|----------------------|
| YDL056W | MBP1         | YER111C | SWI4         | NA                   |
| YER111C | SWI4         | YGR044C | RME1         | NA                   |
| YER111C | SWI4         | YLR403W | SFP1         | NA                   |
| YER111C | SWI4         | YLR182W | SWI6         | NA                   |
| YGR044C | RME1         | YLR182W | SWI6         | NA                   |
| YIL131C | FKH1         | YNL068C | FKH2         | NA                   |
| YNL199C | GCR2         | YPL075W | GCR1         | NA                   |
| YOR358W | HAP5         | YPL075W | GCR1         | NA                   |
| YKR034W | DAL80        | YJL110C | GZF3         | 5.66E-01             |
| YOR113W | AZF1         | YDR043C | NRG1         | 4.99E-01             |
| YOR358W | HAP5         | YBL021C | HAP3         | 4.91E-01             |
| YLR131C | ACE2         | YDR146C | SWI5         | 4.66E-01             |
| YML027W | YOX1         | YDR451C | YHP1         | 4.48E-01             |
| YHR206W | SKN7         | YGL073W | HSF1         | 4.38E-01             |
| YJL110C | GZF3         | YER040W | GLN3         | 4.32E-01             |
| YPL248C | GAL4         | YML051W | GAL80        | 4.31E-01             |
| YNL068C | FKH2         | YBR049C | REB1         | 4.23E-01             |
| YPL038W | MET31        | YDR253C | MET32        | 4.22E-01             |
| YNL314W | DAL82        | YIR023W | DAL81        | 4.19E-01             |
| YOR113W | AZF1         | YDR216W | ADR1         | 4.12E-01             |
| YLR098C | CHA4         | YBL005W | PDR3         | 4.06E-01             |
| YOR113W | AZF1         | YKL062W | MSN4         | 4.03E-01             |
| YMR037C | MSN2         | YKL062W | MSN4         | 3.91E-01             |
| YGL237C | HAP2         | YBL021C | HAP3         | 3.91E-01             |
| YPL089C | RLM1         | YBR182C | SMP1         | 3.90E-01             |
| YOR358W | HAP5         | YGL237C | HAP2         | 3.89E-01             |
| YPL202C | AFT2         | YGL071W | RCS1         | 3.84E-01             |
| YPL089C | RLM1         | YMR043W | MCM1         | 3.80E-01             |
| YOR113W | AZF1         | YMR037C | MSN2         | 3.74E-01             |
| YGL035C | MIG1         | YDR146C | SWI5         | 3.70E-01             |
| YPR104C | FHL1         | YIL131C | FKH1         | 3.69E-01             |
| YFL021W | GAT1         | YER040W | GLN3         | 3.67E-01             |
| YKR034W | DAL80        | YFL021W | GAT1         | 3.66E-01             |
| YOR113W | AZF1         | YGL035C | MIG1         | 3.64E-01             |
| YGL013C | PDR1         | YBR049C | REB1         | 3.63E-01             |
| YJL110C | GZF3         | YDR463W | STP1         | 3.62E-01             |
| YNL068C | FKH2         | YGL013C | PDR1         | 3.57E-01             |
| YGL013C | PDR1         | YDR421W | ARO80        | 3.53E-01             |
| YLR131C | ACE2         | YDR216W | ADR1         | 3.53E-01             |
| YKL062W | MSN4         | YGL035C | MIG1         | 3.49E-01             |
| YHR206W | SKN7         | YDL056W | MBP1         | 3.47E-01             |
| YOR113W | AZF1         | YDR146C | SWI5         | 3.46E-01             |
| YER111C | SWI4         | YDR146C | SWI5         | 3.45E-01             |
| YPR104C | FHL1         | YNL068C | FKH2         | 3.43E-01             |
| YOR113W | AZF1         | YGL071W | RCS1         | 3.42E-01             |
| YMR070W | MOT3         | YMR037C | MSN2         | 3.37E-01             |
| YPL038W | MET31        | YIR017C | MET28        | 3.37E-01             |
| YDR216W | ADR1         | YDR043C | NRG1         | 3.36E-01             |
| YDR463W | STP1         | YDR123C | INO2         | 3.35E-01             |

|         |       |         |       |          |
|---------|-------|---------|-------|----------|
| YNL103W | MET4  | YDR463W | STP1  | 3.34E-01 |
| YOR113W | AZF1  | YER169W | RPH1  | 3.33E-01 |
| YGL035C | MIG1  | YDR043C | NRG1  | 3.33E-01 |
| YJL110C | GZF3  | YIL131C | FKH1  | 3.33E-01 |
| YPL038W | MET31 | YNL103W | MET4  | 3.31E-01 |
| YML051W | GAL80 | YDR463W | STP1  | 3.30E-01 |
| YNL103W | MET4  | YDR253C | MET32 | 3.29E-01 |
| YGL035C | MIG1  | YER161C | SPT2  | 3.26E-01 |
| YPR199C | ARR1  | YPL089C | RLM1  | 3.25E-01 |
| YER040W | GLN3  | YEL009C | GCN4  | 3.23E-01 |
| YOR113W | AZF1  | YJL056C | ZAP1  | 3.23E-01 |
| YJL089W | SIP4  | YFL031W | HAC1  | 3.23E-01 |
| YLR131C | ACE2  | YDR259C | YAP6  | 3.23E-01 |
| YPL038W | MET31 | YGL013C | PDR1  | 3.21E-01 |
| YIL131C | FKH1  | YDR310C | SUM1  | 3.16E-01 |
| YDR146C | SWI5  | YBR049C | REB1  | 3.15E-01 |
| YLR131C | ACE2  | YBR049C | REB1  | 3.14E-01 |
| YPR199C | ARR1  | YIL131C | FKH1  | 3.13E-01 |
| YPL038W | MET31 | YKL015W | PUT3  | 3.13E-01 |
| YDR463W | STP1  | YDR259C | YAP6  | 3.12E-01 |
| YPR199C | ARR1  | YJL110C | GZF3  | 3.11E-01 |
| YNL167C | SKO1  | YBR049C | REB1  | 3.08E-01 |
| YOR113W | AZF1  | YGL013C | PDR1  | 3.07E-01 |
| YJL110C | GZF3  | YHL009C | YAP3  | 3.07E-01 |
| YNL103W | MET4  | YLR451W | LEU3  | 3.06E-01 |
| YGL013C | PDR1  | YBL005W | PDR3  | 3.05E-01 |
| YHR206W | SKN7  | YER161C | SPT2  | 3.05E-01 |
| YLR131C | ACE2  | YIL131C | FKH1  | 3.03E-01 |
| YNL167C | SKO1  | YIL131C | FKH1  | 3.03E-01 |
| YKL015W | PUT3  | YGL013C | PDR1  | 3.03E-01 |
| YGL131C | SNT2  | YDL048C | STP4  | 3.02E-01 |
| YJL110C | GZF3  | YIR018W | YAP5  | 3.01E-01 |
| YPL038W | MET31 | YLR098C | CHA4  | 3.01E-01 |
| YPL038W | MET31 | YBR049C | REB1  | 3.00E-01 |
| YJL089W | SIP4  | YEL009C | GCN4  | 2.99E-01 |
| YOR113W | AZF1  | YLR176C | RFX1  | 2.99E-01 |
| YGL162W | SUT1  | YER040W | GLN3  | 2.98E-01 |
| YGL035C | MIG1  | YBR049C | REB1  | 2.97E-01 |
| YIL036W | CST6  | YBR049C | REB1  | 2.96E-01 |
| YPL038W | MET31 | YJL110C | GZF3  | 2.96E-01 |
| YMR037C | MSN2  | YGL035C | MIG1  | 2.95E-01 |
| YOR113W | AZF1  | YNL103W | MET4  | 2.95E-01 |
| YMR021C | MAC1  | YBL005W | PDR3  | 2.94E-01 |
| YOR358W | HAP5  | YKL109W | HAP4  | 2.94E-01 |
| YLR131C | ACE2  | YGL035C | MIG1  | 2.93E-01 |
| YML007W | YAP1  | YER040W | GLN3  | 2.93E-01 |
| YOR113W | AZF1  | YIR018W | YAP5  | 2.91E-01 |
| YJL110C | GZF3  | YGL071W | RCS1  | 2.91E-01 |
| YOR113W | AZF1  | YOR028C | CIN5  | 2.91E-01 |
| YNL167C | SKO1  | YNL068C | FKH2  | 2.90E-01 |
| YPL038W | MET31 | YKR034W | DAL80 | 2.89E-01 |
| YER161C | SPT2  | YBR049C | REB1  | 2.89E-01 |

|         |       |         |       |          |
|---------|-------|---------|-------|----------|
| YPR199C | ARR1  | YDR123C | INO2  | 2.87E-01 |
| YOR162C | YRR1  | YML051W | GAL80 | 2.86E-01 |
| YNL309W | STB1  | YLR182W | SWI6  | 2.86E-01 |
| YOL108C | INO4  | YBR049C | REB1  | 2.86E-01 |
| YML007W | YAP1  | YDR463W | STP1  | 2.85E-01 |
| YML051W | GAL80 | YLR256W | HAP1  | 2.85E-01 |
| YKR034W | DAL80 | YER040W | GLN3  | 2.84E-01 |
| YIL131C | FKH1  | YDR423C | CAD1  | 2.84E-01 |
| YDR477W | SNF1  | YDR043C | NRG1  | 2.83E-01 |
| YPL089C | RLM1  | YOL108C | INO4  | 2.83E-01 |
| YPR104C | FHL1  | YMR043W | MCM1  | 2.83E-01 |
| YLR182W | SWI6  | YIL131C | FKH1  | 2.83E-01 |
| YOR372C | NDD1  | YIL131C | FKH1  | 2.82E-01 |
| YJL089W | SIP4  | YDR477W | SNF1  | 2.82E-01 |
| YOR028C | CIN5  | YJL110C | GZF3  | 2.82E-01 |
| YGL035C | MIG1  | YDR310C | SUM1  | 2.80E-01 |
| YOR113W | AZF1  | YIR017C | MET28 | 2.80E-01 |
| YNL068C | FKH2  | YLR131C | ACE2  | 2.78E-01 |
| YJL089W | SIP4  | YDR463W | STP1  | 2.78E-01 |
| YMR042W | ARG80 | YDR463W | STP1  | 2.78E-01 |
| YPR199C | ARR1  | YOL108C | INO4  | 2.77E-01 |
| YOR162C | YRR1  | YHR178W | STB5  | 2.77E-01 |
| YKL062W | MSN4  | YDR043C | NRG1  | 2.77E-01 |
| YOL108C | INO4  | YIL131C | FKH1  | 2.77E-01 |
| YPR065W | ROX1  | YOR372C | NDD1  | 2.77E-01 |
| YLR176C | RFX1  | YIR018W | YAP5  | 2.77E-01 |
| YNL199C | GCR2  | YDR259C | YAP6  | 2.76E-01 |
| YKL015W | PUT3  | YDR463W | STP1  | 2.76E-01 |
| YLR451W | LEU3  | YBR049C | REB1  | 2.76E-01 |
| YJL056C | ZAP1  | YDR463W | STP1  | 2.76E-01 |
| YLR098C | CHA4  | YKR034W | DAL80 | 2.75E-01 |
| YNL167C | SKO1  | YGL035C | MIG1  | 2.75E-01 |
| YMR037C | MSN2  | YDR451C | YHP1  | 2.74E-01 |
| YML007W | YAP1  | YDR423C | CAD1  | 2.74E-01 |
| YDR421W | ARO80 | YBL005W | PDR3  | 2.74E-01 |
| YBR240C | THI2  | YBR049C | REB1  | 2.74E-01 |
| YGL162W | SUT1  | YBL005W | PDR3  | 2.73E-01 |
| YNL314W | DAL82 | YLR098C | CHA4  | 2.73E-01 |
| YMR037C | MSN2  | YDR146C | SWI5  | 2.73E-01 |
| YLR176C | RFX1  | YKL020C | SPT23 | 2.73E-01 |
| YEL009C | GCN4  | YBL005W | PDR3  | 2.72E-01 |
| YOR113W | AZF1  | YML007W | YAP1  | 2.72E-01 |
| YLR098C | CHA4  | YDR421W | ARO80 | 2.71E-01 |
| YMR043W | MCM1  | YDR451C | YHP1  | 2.70E-01 |
| YPL089C | RLM1  | YDR423C | CAD1  | 2.69E-01 |
| YLR098C | CHA4  | YIR018W | YAP5  | 2.69E-01 |
| YIR017C | MET28 | YGL162W | SUT1  | 2.69E-01 |
| YMR042W | ARG80 | YBL005W | PDR3  | 2.69E-01 |
| YLR098C | CHA4  | YDR259C | YAP6  | 2.69E-01 |
| YIR018W | YAP5  | YIL131C | FKH1  | 2.68E-01 |
| YML007W | YAP1  | YEL009C | GCN4  | 2.68E-01 |
| YIL131C | FKH1  | YBR049C | REB1  | 2.68E-01 |

|         |       |         |        |          |
|---------|-------|---------|--------|----------|
| YJL056C | ZAP1  | YIL131C | FKH1   | 2.67E-01 |
| YIR017C | MET28 | YDR463W | STP1   | 2.67E-01 |
| YER111C | SWI4  | YDR451C | YHP1   | 2.67E-01 |
| YNL199C | GCR2  | YDR421W | ARO80  | 2.67E-01 |
| YNL314W | DAL82 | YNL199C | GCR2   | 2.67E-01 |
| YNL199C | GCR2  | YNL068C | FKH2   | 2.66E-01 |
| YLR098C | CHA4  | YKL015W | PUT3   | 2.66E-01 |
| YIL131C | FKH1  | YGL071W | RCS1   | 2.65E-01 |
| YML051W | GAL80 | YLR131C | ACE2   | 2.64E-01 |
| YNL314W | DAL82 | YJL110C | GZF3   | 2.64E-01 |
| YLR098C | CHA4  | YIL131C | FKH1   | 2.64E-01 |
| YNL103W | MET4  | YJL110C | GZF3   | 2.63E-01 |
| YLR451W | LEU3  | YBL005W | PDR3   | 2.63E-01 |
| YKL038W | RGT1  | YJL089W | SIP4   | 2.63E-01 |
| YDR463W | STP1  | YDR421W | ARO80  | 2.63E-01 |
| YPL038W | MET31 | YEL009C | GCN4   | 2.63E-01 |
| YLR098C | CHA4  | YGL013C | PDR1   | 2.63E-01 |
| YGR044C | RME1  | YBR049C | REB1   | 2.63E-01 |
| YIR018W | YAP5  | YIR017C | MET28  | 2.62E-01 |
| YIL131C | FKH1  | YDR463W | STP1   | 2.62E-01 |
| YPR104C | FHL1  | YKL112W | ABF1   | 2.62E-01 |
| YOR113W | AZF1  | YHL027W | RIM101 | 2.61E-01 |
| YOR113W | AZF1  | YBR049C | REB1   | 2.61E-01 |
| YOR372C | NDD1  | YNL068C | FKH2   | 2.61E-01 |
| YMR019W | STB4  | YCR106W | RDS1   | 2.61E-01 |
| YPR199C | ARR1  | YDR423C | CAD1   | 2.60E-01 |
| YJL056C | ZAP1  | YGL162W | SUT1   | 2.60E-01 |
| YLR176C | RFX1  | YGR044C | RME1   | 2.59E-01 |
| YPL038W | MET31 | YOR113W | AZF1   | 2.59E-01 |
| YJL110C | GZF3  | YJL056C | ZAP1   | 2.58E-01 |
| YKL015W | PUT3  | YBL005W | PDR3   | 2.58E-01 |
| YHL009C | YAP3  | YDR123C | INO2   | 2.57E-01 |
| YLR131C | ACE2  | YFL021W | GAT1   | 2.56E-01 |
| YHR206W | SKN7  | YBR049C | REB1   | 2.56E-01 |
| YIR017C | MET28 | YBL005W | PDR3   | 2.56E-01 |
| YPL038W | MET31 | YJL089W | SIP4   | 2.54E-01 |
| YIL131C | FKH1  | YDR123C | INO2   | 2.54E-01 |
| YOR113W | AZF1  | YLR131C | ACE2   | 2.54E-01 |
| YMR037C | MSN2  | YDR216W | ADR1   | 2.53E-01 |
| YJL110C | GZF3  | YDR253C | MET32  | 2.53E-01 |
| YLR098C | CHA4  | YGL162W | SUT1   | 2.53E-01 |
| YML007W | YAP1  | YHL009C | YAP3   | 2.53E-01 |
| YNL314W | DAL82 | YKR034W | DAL80  | 2.53E-01 |
| YFL031W | HAC1  | YDR463W | STP1   | 2.53E-01 |
| YLR176C | RFX1  | YBR049C | REB1   | 2.53E-01 |
| YGR044C | RME1  | YDR043C | NRG1   | 2.52E-01 |
| YNL167C | SKO1  | YDR451C | YHP1   | 2.52E-01 |
| YLR131C | ACE2  | YDR423C | CAD1   | 2.52E-01 |
| YDR123C | INO2  | YBR182C | SMP1   | 2.52E-01 |
| YDR463W | STP1  | YBR083W | TEC1   | 2.52E-01 |
| YDR259C | YAP6  | YBL005W | PDR3   | 2.51E-01 |
| YDR123C | INO2  | YBR240C | THI2   | 2.51E-01 |

|         |       |         |       |          |
|---------|-------|---------|-------|----------|
| YOR028C | CIN5  | YKL038W | RGT1  | 2.51E-01 |
| YOR113W | AZF1  | YGR044C | RME1  | 2.51E-01 |
| YOR113W | AZF1  | YJL110C | GZF3  | 2.51E-01 |
| YJL110C | GZF3  | YJL089W | SIP4  | 2.49E-01 |
| YMR037C | MSN2  | YDR043C | NRG1  | 2.49E-01 |
| YEL009C | GCN4  | YDR463W | STP1  | 2.49E-01 |
| YNL199C | GCR2  | YLR182W | SWI6  | 2.49E-01 |
| YIR017C | MET28 | YBR240C | THI2  | 2.49E-01 |
| YNL199C | GCR2  | YBR240C | THI2  | 2.49E-01 |
| YML027W | YOX1  | YIL131C | FKH1  | 2.48E-01 |
| YPL038W | MET31 | YER161C | SPT2  | 2.48E-01 |
| YJL110C | GZF3  | YDR123C | INO2  | 2.48E-01 |
| YPL038W | MET31 | YGL035C | MIG1  | 2.48E-01 |
| YIR018W | YAP5  | YDR421W | ARO80 | 2.47E-01 |
| YBR083W | TEC1  | YBL005W | PDR3  | 2.46E-01 |
| YGL013C | PDR1  | YDR123C | INO2  | 2.46E-01 |
| YOR113W | AZF1  | YIL131C | FKH1  | 2.46E-01 |
| YMR037C | MSN2  | YHR206W | SKN7  | 2.46E-01 |
| YLR182W | SWI6  | YDL056W | MBP1  | 2.46E-01 |
| YML007W | YAP1  | YIR018W | YAP5  | 2.46E-01 |
| YGL162W | SUT1  | YEL009C | GCN4  | 2.45E-01 |
| YPL248C | GAL4  | YDR477W | SNF1  | 2.45E-01 |
| YLR182W | SWI6  | YGL181W | GTS1  | 2.45E-01 |
| YOR372C | NDD1  | YBR049C | REB1  | 2.44E-01 |
| YKL043W | PHD1  | YJL110C | GZF3  | 2.43E-01 |
| YJL089W | SIP4  | YGL162W | SUT1  | 2.43E-01 |
| YOR113W | AZF1  | YNL199C | GCR2  | 2.43E-01 |
| YLR013W | GAT3  | YER040W | GLN3  | 2.43E-01 |
| YIL131C | FKH1  | YBL005W | PDR3  | 2.43E-01 |
| YDR123C | INO2  | YBR049C | REB1  | 2.43E-01 |
| YLR131C | ACE2  | YDR463W | STP1  | 2.43E-01 |
| YML007W | YAP1  | YLR131C | ACE2  | 2.43E-01 |
| YLR451W | LEU3  | YJL089W | SIP4  | 2.42E-01 |
| YJL110C | GZF3  | YGL035C | MIG1  | 2.42E-01 |
| YNL103W | MET4  | YKL015W | PUT3  | 2.41E-01 |
| YNL167C | SKO1  | YBL005W | PDR3  | 2.41E-01 |
| YLR176C | RFX1  | YBR240C | THI2  | 2.41E-01 |
| YNL199C | GCR2  | YKL062W | MSN4  | 2.40E-01 |
| YNL199C | GCR2  | YIL131C | FKH1  | 2.40E-01 |
| YGL162W | SUT1  | YDR463W | STP1  | 2.40E-01 |
| YNL068C | FKH2  | YDR451C | YHP1  | 2.40E-01 |
| YPL248C | GAL4  | YHL009C | YAP3  | 2.39E-01 |
| YLR098C | CHA4  | YDR123C | INO2  | 2.39E-01 |
| YPL248C | GAL4  | YBR240C | THI2  | 2.39E-01 |
| YOR113W | AZF1  | YKL020C | SPT23 | 2.39E-01 |
| YOR028C | CIN5  | YLR098C | CHA4  | 2.39E-01 |
| YDR123C | INO2  | YBL103C | RTG3  | 2.39E-01 |
| YDR421W | ARO80 | YDR259C | YAP6  | 2.38E-01 |
| YLR098C | CHA4  | YGR044C | RME1  | 2.38E-01 |
| YGR044C | RME1  | YGL035C | MIG1  | 2.38E-01 |
| YNL199C | GCR2  | YGL013C | PDR1  | 2.38E-01 |
| YIL131C | FKH1  | YBR182C | SMP1  | 2.38E-01 |

|         |       |         |       |          |
|---------|-------|---------|-------|----------|
| YPL202C | AFT2  | YDR123C | INO2  | 2.38E-01 |
| YOR113W | AZF1  | YDR463W | STP1  | 2.38E-01 |
| YLR182W | SWI6  | YLR131C | ACE2  | 2.38E-01 |
| YLR013W | GAT3  | YJL110C | GZF3  | 2.38E-01 |
| YOR028C | CIN5  | YDR259C | YAP6  | 2.38E-01 |
| YLR013W | GAT3  | YKR034W | DAL80 | 2.37E-01 |
| YLR098C | CHA4  | YHR178W | STB5  | 2.37E-01 |
| YGL013C | PDR1  | YDR043C | NRG1  | 2.37E-01 |
| YOR113W | AZF1  | YER161C | SPT2  | 2.37E-01 |
| YPL089C | RLM1  | YLR131C | ACE2  | 2.36E-01 |
| YGL035C | MIG1  | YDR477W | SNF1  | 2.36E-01 |
| YGL071W | RCS1  | YDR463W | STP1  | 2.36E-01 |
| YPL038W | MET31 | YIR023W | DAL81 | 2.36E-01 |
| YOR344C | TYE7  | YDR463W | STP1  | 2.36E-01 |
| YML051W | GAL80 | YJL110C | GZF3  | 2.35E-01 |
| YDR423C | CAD1  | YDR421W | ARO80 | 2.35E-01 |
| YLR131C | ACE2  | YJL110C | GZF3  | 2.35E-01 |
| YOR113W | AZF1  | YLR182W | SWI6  | 2.35E-01 |
| YOL108C | INO4  | YDR123C | INO2  | 2.35E-01 |
| YIL131C | FKH1  | YDR259C | YAP6  | 2.34E-01 |
| YNL199C | GCR2  | YKL015W | PUT3  | 2.34E-01 |
| YPR104C | FHL1  | YBR240C | THI2  | 2.33E-01 |
| YER169W | RPH1  | YDR216W | ADR1  | 2.33E-01 |
| YPL089C | RLM1  | YGL071W | RCS1  | 2.33E-01 |
| YPL089C | RLM1  | YDR463W | STP1  | 2.33E-01 |
| YKL043W | PHD1  | YIL131C | FKH1  | 2.32E-01 |
| YOR372C | NDD1  | YNL199C | GCR2  | 2.32E-01 |
| YML007W | YAP1  | YGL162W | SUT1  | 2.32E-01 |
| YPL089C | RLM1  | YLR182W | SWI6  | 2.32E-01 |
| YLR256W | HAP1  | YBR240C | THI2  | 2.32E-01 |
| YIR023W | DAL81 | YDR123C | INO2  | 2.32E-01 |
| YOR372C | NDD1  | YJL110C | GZF3  | 2.32E-01 |
| YPL038W | MET31 | YDR146C | SWI5  | 2.32E-01 |
| YDR463W | STP1  | YBL005W | PDR3  | 2.31E-01 |
| YKL015W | PUT3  | YDR421W | ARO80 | 2.31E-01 |
| YKL109W | HAP4  | YBL021C | HAP3  | 2.31E-01 |
| YPL089C | RLM1  | YML051W | GAL80 | 2.31E-01 |
| YPR104C | FHL1  | YBR049C | REB1  | 2.31E-01 |
| YPL089C | RLM1  | YGL073W | HSF1  | 2.30E-01 |
| YNL103W | MET4  | YLR098C | CHA4  | 2.30E-01 |
| YOR162C | YRR1  | YJL089W | SIP4  | 2.30E-01 |
| YPR104C | FHL1  | YNL139C | RLR1  | 2.30E-01 |
| YPL038W | MET31 | YDR123C | INO2  | 2.30E-01 |
| YPL248C | GAL4  | YOR358W | HAP5  | 2.30E-01 |
| YMR042W | ARG80 | YDR421W | ARO80 | 2.29E-01 |
| YJL110C | GZF3  | YDR451C | YHP1  | 2.29E-01 |
| YJL056C | ZAP1  | YDR123C | INO2  | 2.29E-01 |
| YNL167C | SKO1  | YDR463W | STP1  | 2.29E-01 |
| YPR065W | ROX1  | YLR098C | CHA4  | 2.29E-01 |
| YLR176C | RFX1  | YLR098C | CHA4  | 2.28E-01 |
| YKR034W | DAL80 | YKL043W | PHD1  | 2.28E-01 |
| YLR098C | CHA4  | YBR049C | REB1  | 2.28E-01 |



|         |       |         |        |          |
|---------|-------|---------|--------|----------|
| YBL103C | RTG3  | YBL005W | PDR3   | 2.28E-01 |
| YHR206W | SKN7  | YDR043C | NRG1   | 2.28E-01 |
| YNL216W | RAP1  | YKL112W | ABF1   | 2.27E-01 |
| YPR104C | FHL1  | YOL108C | INO4   | 2.26E-01 |
| YLR131C | ACE2  | YEL009C | GCN4   | 2.26E-01 |
| YKL062W | MSN4  | YDL106C | PHO2   | 2.26E-01 |
| YDR259C | YAP6  | YBR049C | REB1   | 2.26E-01 |
| YJL089W | SIP4  | YFL021W | GAT1   | 2.25E-01 |
| YKR034W | DAL80 | YDR463W | STP1   | 2.25E-01 |
| YNL314W | DAL82 | YBR240C | THI2   | 2.25E-01 |
| YHL020C | OPI1  | YBR049C | REB1   | 2.25E-01 |
| YPL089C | RLM1  | YJR060W | CBF1   | 2.25E-01 |
| YNL167C | SKO1  | YER161C | SPT2   | 2.25E-01 |
| YIL131C | FKH1  | YDR421W | ARO80  | 2.24E-01 |
| YJL056C | ZAP1  | YDR043C | NRG1   | 2.23E-01 |
| YPL089C | RLM1  | YGL013C | PDR1   | 2.23E-01 |
| YNL167C | SKO1  | YMR037C | MSN2   | 2.23E-01 |
| YOR162C | YRR1  | YBR182C | SMP1   | 2.23E-01 |
| YLR098C | CHA4  | YBR240C | THI2   | 2.23E-01 |
| YOR113W | AZF1  | YOL108C | INO4   | 2.22E-01 |
| YMR042W | ARG80 | YJL089W | SIP4   | 2.22E-01 |
| YNL199C | GCR2  | YDR310C | SUM1   | 2.22E-01 |
| YOR028C | CIN5  | YMR042W | ARG80  | 2.22E-01 |
| YKL020C | SPT23 | YGL071W | RCS1   | 2.22E-01 |
| YLR176C | RFX1  | YLR131C | ACE2   | 2.22E-01 |
| YDR259C | YAP6  | YDR146C | SWI5   | 2.21E-01 |
| YDR423C | CAD1  | YDR146C | SWI5   | 2.21E-01 |
| YIR017C | MET28 | YFL021W | GAT1   | 2.21E-01 |
| YLR013W | GAT3  | YDL056W | MBP1   | 2.20E-01 |
| YMR037C | MSN2  | YJL056C | ZAP1   | 2.20E-01 |
| YNL199C | GCR2  | YLR098C | CHA4   | 2.20E-01 |
| YKL015W | PUT3  | YJL110C | GZF3   | 2.20E-01 |
| YOR372C | NDD1  | YML027W | YOX1   | 2.20E-01 |
| YOR344C | TYE7  | YKL043W | PHD1   | 2.20E-01 |
| YOR113W | AZF1  | YLR098C | CHA4   | 2.20E-01 |
| YML027W | YOX1  | YJL110C | GZF3   | 2.20E-01 |
| YNL216W | RAP1  | YFL021W | GAT1   | 2.20E-01 |
| YPR199C | ARR1  | YPL202C | AFT2   | 2.20E-01 |
| YGL035C | MIG1  | YER169W | RPH1   | 2.19E-01 |
| YOR344C | TYE7  | YJL110C | GZF3   | 2.19E-01 |
| YHR178W | STB5  | YDR123C | INO2   | 2.19E-01 |
| YKL020C | SPT23 | YDR146C | SWI5   | 2.19E-01 |
| YML051W | GAL80 | YBL005W | PDR3   | 2.19E-01 |
| YKL020C | SPT23 | YBR049C | REB1   | 2.19E-01 |
| YLR176C | RFX1  | YJL110C | GZF3   | 2.19E-01 |
| YPL089C | RLM1  | YJL089W | SIP4   | 2.19E-01 |
| YIL131C | FKH1  | YER161C | SPT2   | 2.19E-01 |
| YLR176C | RFX1  | YHL027W | RIM101 | 2.18E-01 |
| YML051W | GAL80 | YIL131C | FKH1   | 2.18E-01 |
| YNL103W | MET4  | YIR018W | YAP5   | 2.18E-01 |
| YNL199C | GCR2  | YER161C | SPT2   | 2.18E-01 |
| YLR098C | CHA4  | YDL056W | MBP1   | 2.18E-01 |

|         |         |         |       |          |
|---------|---------|---------|-------|----------|
| YNL068C | FKH2    | YIL036W | CST6  | 2.18E-01 |
| YPL089C | RLM1    | YDR216W | ADR1  | 2.18E-01 |
| YOR372C | NDD1    | YDR463W | STP1  | 2.17E-01 |
| YPL038W | MET31   | YNL314W | DAL82 | 2.17E-01 |
| YJR060W | CBF1    | YIR017C | MET28 | 2.17E-01 |
| YKL032C | IXR1    | YGL035C | MIG1  | 2.17E-01 |
| YLR013W | GAT3    | YHR206W | SKN7  | 2.17E-01 |
| YPL248C | GAL4    | YDR216W | ADR1  | 2.16E-01 |
| YPL089C | RLM1    | YDR259C | YAP6  | 2.16E-01 |
| YDR043C | NRG1    | YBR049C | REB1  | 2.16E-01 |
| YJL110C | GZF3    | YIR017C | MET28 | 2.16E-01 |
| YIL131C | FKH1    | YHL020C | OPI1  | 2.16E-01 |
| YIL036W | CST6    | YDR146C | SWI5  | 2.16E-01 |
| YPR104C | FHL1    | YDR146C | SWI5  | 2.14E-01 |
| YPL075W | GCR1    | YLR131C | ACE2  | 2.14E-01 |
| YNL199C | GCR2    | YGL071W | RCS1  | 2.14E-01 |
| YIL131C | FKH1    | YGL035C | MIG1  | 2.13E-01 |
| YIR017C | MET28   | YBR049C | REB1  | 2.13E-01 |
| YOR113W | AZF1    | YDL056W | MBP1  | 2.13E-01 |
| YML051W | GAL80   | YIR018W | YAP5  | 2.13E-01 |
| YHR084W | STE12   | YBL005W | PDR3  | 2.13E-01 |
| YML051W | GAL80   | YDR423C | CAD1  | 2.13E-01 |
| YJL110C | GZF3    | YBR049C | REB1  | 2.13E-01 |
| YKL043W | PHD1    | YBR182C | SMP1  | 2.13E-01 |
| YPL089C | RLM1    | YDR123C | INO2  | 2.12E-01 |
| YJL110C | GZF3    | YBR240C | THI2  | 2.12E-01 |
| YDR463W | STP1    | YBR240C | THI2  | 2.12E-01 |
| YPL075W | GCR1    | YIL131C | FKH1  | 2.12E-01 |
| YKL112W | ABF1    | YKL032C | IXR1  | 2.12E-01 |
| YKL020C | SPT23   | YIR018W | YAP5  | 2.12E-01 |
| YJL110C | GZF3    | YDR423C | CAD1  | 2.11E-01 |
| YOR113W | AZF1    | YEL009C | GCN4  | 2.11E-01 |
| YGL013C | PDR1    | YBR240C | THI2  | 2.10E-01 |
| YIR018W | YAP5    | YIL036W | CST6  | 2.10E-01 |
| YKL043W | PHD1    | YHL009C | YAP3  | 2.10E-01 |
| YOR113W | AZF1    | YNL068C | FKH2  | 2.10E-01 |
| YMR037C | MSN2    | YDR463W | STP1  | 2.10E-01 |
| YLR131C | ACE2    | YLR098C | CHA4  | 2.10E-01 |
| YPL089C | RLM1    | YHL009C | YAP3  | 2.10E-01 |
| YMR042W | ARG80   | YKL043W | PHD1  | 2.10E-01 |
| YPL089C | RLM1    | YNL199C | GCR2  | 2.10E-01 |
| YLR182W | SWI6    | YHL020C | OPI1  | 2.10E-01 |
| YOL108C | INO4    | YDR451C | YHP1  | 2.09E-01 |
| YDR520C | YDR520C | YDL048C | STP4  | 2.09E-01 |
| YLR451W | LEU3    | YFL021W | GAT1  | 2.09E-01 |
| YPR104C | FHL1    | YHR178W | STB5  | 2.09E-01 |
| YIR023W | DAL81   | YDR146C | SWI5  | 2.09E-01 |
| YNL103W | MET4    | YLR013W | GAT3  | 2.09E-01 |
| YLR098C | CHA4    | YIR023W | DAL81 | 2.09E-01 |
| YPL089C | RLM1    | YLR451W | LEU3  | 2.08E-01 |
| YOL108C | INO4    | YDR423C | CAD1  | 2.08E-01 |
| YNL314W | DAL82   | YIL036W | CST6  | 2.08E-01 |

|         |       |         |        |          |
|---------|-------|---------|--------|----------|
| YLR256W | HAP1  | YIL131C | FKH1   | 2.08E-01 |
| YNL068C | FKH2  | YDL056W | MBP1   | 2.08E-01 |
| YNL314W | DAL82 | YKL015W | PUT3   | 2.08E-01 |
| YNL314W | DAL82 | YNL167C | SKO1   | 2.08E-01 |
| YMR070W | MOT3  | YLR013W | GAT3   | 2.07E-01 |
| YGL071W | RCS1  | YDR043C | NRG1   | 2.07E-01 |
| YPL089C | RLM1  | YBR240C | THI2   | 2.07E-01 |
| YIL131C | FKH1  | YHR084W | STE12  | 2.07E-01 |
| YNL068C | FKH2  | YDR421W | ARO80  | 2.07E-01 |
| YKL015W | PUT3  | YJL089W | SIP4   | 2.07E-01 |
| YOL108C | INO4  | YMR043W | MCM1   | 2.07E-01 |
| YOR372C | NDD1  | YML051W | GAL80  | 2.07E-01 |
| YDR421W | ARO80 | YDR146C | SWI5   | 2.06E-01 |
| YOR372C | NDD1  | YNL103W | MET4   | 2.06E-01 |
| YMR021C | MAC1  | YDR463W | STP1   | 2.06E-01 |
| YPL248C | GAL4  | YDR463W | STP1   | 2.06E-01 |
| YLR098C | CHA4  | YKL038W | RGT1   | 2.06E-01 |
| YPL089C | RLM1  | YHR084W | STE12  | 2.06E-01 |
| YOR372C | NDD1  | YDR146C | SWI5   | 2.06E-01 |
| YOL108C | INO4  | YHL009C | YAP3   | 2.06E-01 |
| YOR113W | AZF1  | YGL073W | HSF1   | 2.06E-01 |
| YML051W | GAL80 | YKL015W | PUT3   | 2.06E-01 |
| YPL038W | MET31 | YNL199C | GCR2   | 2.06E-01 |
| YDR423C | CAD1  | YDR123C | INO2   | 2.05E-01 |
| YJL089W | SIP4  | YDR421W | ARO80  | 2.05E-01 |
| YKL062W | MSN4  | YHR206W | SKN7   | 2.05E-01 |
| YPR199C | ARR1  | YBR240C | THI2   | 2.05E-01 |
| YLR098C | CHA4  | YJL110C | GZF3   | 2.05E-01 |
| YPR104C | FHL1  | YOR372C | NDD1   | 2.04E-01 |
| YPL038W | MET31 | YLR451W | LEU3   | 2.04E-01 |
| YJL089W | SIP4  | YIL131C | FKH1   | 2.04E-01 |
| YNL167C | SKO1  | YLR098C | CHA4   | 2.04E-01 |
| YLR098C | CHA4  | YGL071W | RCS1   | 2.04E-01 |
| YGL071W | RCS1  | YBR049C | REB1   | 2.03E-01 |
| YMR043W | MCM1  | YIL131C | FKH1   | 2.03E-01 |
| YKL062W | MSN4  | YHL027W | RIM101 | 2.03E-01 |
| YMR037C | MSN2  | YIL131C | FKH1   | 2.03E-01 |
| YOL028C | YAP7  | YBR049C | REB1   | 2.03E-01 |
| YMR070W | MOT3  | YLR403W | SFP1   | 2.03E-01 |
| YER161C | SPT2  | YDR259C | YAP6   | 2.03E-01 |
| YGL013C | PDR1  | YDR463W | STP1   | 2.02E-01 |
| YJL089W | SIP4  | YGL035C | MIG1   | 2.02E-01 |
| YDR146C | SWI5  | YBR083W | TEC1   | 2.02E-01 |
| YHL020C | OPI1  | YBL005W | PDR3   | 2.02E-01 |
| YPR065W | ROX1  | YLR131C | ACE2   | 2.02E-01 |
| YPL089C | RLM1  | YDR451C | YHP1   | 2.02E-01 |
| YMR016C | SOK2  | YHR206W | SKN7   | 2.02E-01 |
| YLR256W | HAP1  | YJL089W | SIP4   | 2.02E-01 |
| YOR372C | NDD1  | YBR182C | SMP1   | 2.01E-01 |
| YMR042W | ARG80 | YIR018W | YAP5   | 2.01E-01 |
| YGL073W | HSF1  | YDR451C | YHP1   | 2.01E-01 |
| YKL112W | ABF1  | YIL131C | FKH1   | 2.01E-01 |

|         |       |         |      |          |
|---------|-------|---------|------|----------|
| YLR182W | SWI6  | YKL112W | ABF1 | 2.01E-01 |
| YPL038W | MET31 | YMR037C | MSN2 | 2.01E-01 |
| YMR037C | MSN2  | YLR182W | SWI6 | 2.01E-01 |
| YKL020C | SPT23 | YIL131C | FKH1 | 2.01E-01 |
| YNL314W | DAL82 | YGL013C | PDR1 | 2.01E-01 |
| YNL199C | GCR2  | YBR049C | REB1 | 2.01E-01 |
| YML027W | YOX1  | YGL162W | SUT1 | 2.01E-01 |
| YNL068C | FKH2  | YKL112W | ABF1 | 2.00E-01 |
| YPL202C | AFT2  | YJL089W | SIP4 | 2.00E-01 |
| YIR018W | YAP5  | YDR123C | INO2 | 2.00E-01 |

**Table 4** - the number of SL interactions for each TF in the TF SL network

| TF    | # of TF SL interactions |
|-------|-------------------------|
| FKH1  | 38                      |
| AZF1  | 34                      |
| GZF3  | 33                      |
| STP1  | 31                      |
| REB1  | 30                      |
| CHA4  | 29                      |
| RLM1  | 23                      |
| ACE2  | 21                      |
| MET31 | 21                      |
| GCR2  | 20                      |
| INO2  | 20                      |
| PDR3  | 19                      |
| SIP4  | 19                      |
| MIG1  | 18                      |
| SWI5  | 16                      |
| MSN2  | 15                      |
| PDR1  | 15                      |
| THI2  | 15                      |
| ARO80 | 14                      |
| FKH2  | 14                      |
| YAP5  | 14                      |
| GAL80 | 13                      |
| NDD1  | 13                      |
| SWI6  | 13                      |
| NRG1  | 12                      |
| PUT3  | 12                      |
| YAP6  | 12                      |
| CAD1  | 11                      |
| DAL82 | 11                      |
| FHL1  | 11                      |
| INO4  | 11                      |
| MET28 | 11                      |
| MET4  | 11                      |
| RCS1  | 11                      |
| SKO1  | 11                      |
| RFX1  | 10                      |
| SUT1  | 10                      |
| YHP1  | 10                      |
| DAL80 | 9                       |
| GCN4  | 9                       |
| SKN7  | 9                       |
| SPT2  | 9                       |
| YAP1  | 9                       |
| ARR1  | 8                       |
| MSN4  | 8                       |
| RME1  | 8                       |
| ZAP1  | 8                       |
| ADR1  | 7                       |
| ARG80 | 7                       |

|        |   |
|--------|---|
| GAL4   | 7 |
| GAT1   | 7 |
| GAT3   | 7 |
| GLN3   | 7 |
| LEU3   | 7 |
| MBP1   | 7 |
| PHD1   | 7 |
| SPT23  | 7 |
| YAP3   | 7 |
| ABF1   | 6 |
| CIN5   | 6 |
| SMP1   | 6 |
| SWI4   | 6 |
| CST6   | 5 |
| DAL81  | 5 |
| HAP5   | 5 |
| MCM1   | 5 |
| YOX1   | 5 |
| AFT2   | 4 |
| GCR1   | 4 |
| HAP1   | 4 |
| HSF1   | 4 |
| OPI1   | 4 |
| SNF1   | 4 |
| STB5   | 4 |
| YRR1   | 4 |
| HAP3   | 3 |
| MET32  | 3 |
| MOT3   | 3 |
| RGT1   | 3 |
| RIM101 | 3 |
| ROX1   | 3 |
| RPH1   | 3 |
| STE12  | 3 |
| SUM1   | 3 |
| TEC1   | 3 |
| TYE7   | 3 |
| CBF1   | 2 |
| HAC1   | 2 |
| HAP2   | 2 |
| HAP4   | 2 |
| IXR1   | 2 |
| MAC1   | 2 |
| RAP1   | 2 |
| RTG3   | 2 |
| SFP1   | 2 |
| STP4   | 2 |
| GTS1   | 1 |
| PHO2   | 1 |
| RDS1   | 1 |
| RLR1   | 1 |
| SNT2   | 1 |

|         |   |
|---------|---|
| SOK2    | 1 |
| STB1    | 1 |
| STB4    | 1 |
| YAP7    | 1 |
| YDR520C | 1 |

## Reference:

- Brem, R. B. and L. Kruglyak (2005). "The landscape of genetic complexity across 5,700 gene expression traits in yeast." Proc Natl Acad Sci U S A **102**(5): 1572-1577.
- Hughes, T. R., M. J. Marton, et al. (2000). "Functional discovery via a compendium of expression profiles." Cell **102**(1): 109-126.
- Lin, D. (1998). An Information-Theoretic Definition of Similarity. ICML.
- Mnaimneh, S., A. P. Davierwala, et al. (2004). "Exploration of essential gene functions via titratable promoter alleles." Cell **118**(1): 31-44.
- Myers, C. L., D. R. Barrett, et al. (2006). "Finding function: evaluation methods for functional genomic data." BMC Genomics **7**: 187.
- Ravasz, E., A. L. Somera, et al. (2002). "Hierarchical organization of modularity in metabolic networks." Science **297**(5586): 1551-1555.
- Schadt, E. E., J. Lamb, et al. (2005). "An integrative genomics approach to infer causal associations between gene expression and disease." Nat Genet **37**(7): 710-717.
- Spellman, P. T., G. Sherlock, et al. (1998). "Comprehensive identification of cell cycle-regulated genes of the yeast *Saccharomyces cerevisiae* by microarray hybridization." Mol Biol Cell **9**(12): 3273-3297.
- Tao, Y., L. Sam, et al. (2007). "Information theory applied to the sparse gene ontology annotation network to predict novel gene function." Bioinformatics **23**(13): i529-538.
- Zhang, B. and S. Horvath (2005). "A general framework for weighted gene co-expression network analysis." Stat Appl Genet Mol Biol **4**: Article17.
- Zhu, J., B. Zhang, et al. (2008). "Integrating large-scale functional genomic data to dissect the complexity of yeast regulatory networks." Nat Genet **40**(7): 854-861.
